# Supplementary material
Source: PubMed Central journal article supplement (PMC6195443)
Supplement: NIHMS970620-supplement-supplement_1.pdf [file NIHMS970620-supplement-supplement_1.pdf]

**Supplemental Table 1. Association Between Fatty Acid Intake and Lung Cancer Risk in the SWHS and SMHS Overall (With Adjustment for Red Meat and Vegetable Intakes)<sup>a</sup>**

|                                   | Pooled Analysis (SMHS+SWHS) |                         | Analysis by Cohort |                  |     |                         |
|-----------------------------------|-----------------------------|-------------------------|--------------------|------------------|-----|-------------------------|
|                                   | #                           | HR (95%CI)              | #                  | HR (95%CI)       | #   | HR (95%CI)              |
| <b>Total Fatty Acid</b>           |                             |                         |                    |                  |     |                         |
| Q1                                | 314                         | Ref.                    | 134                | Ref.             | 180 | Ref.                    |
| Q2                                | 302                         | 0.97 (0.83-1.14)        | 154                | 1.08 (0.85-1.36) | 148 | 0.90 (0.72-1.12)        |
| Q3                                | 277                         | 0.91 (0.77-1.07)        | 150                | 1.04 (0.82-1.31) | 127 | <b>0.81 (0.64-1.02)</b> |
| Q4                                | 308                         | 1.01 (0.86-1.19)        | 168                | 1.12 (0.89-1.41) | 140 | 0.92 (0.73-1.16)        |
| Q5                                | 295                         | 0.97 (0.81-1.17)        | 176                | 1.10 (0.85-1.43) | 119 | 0.83 (0.63-1.08)        |
| <i>P<sub>trend</sub></i>          |                             | 0.90                    |                    | 0.43             |     | 0.22                    |
| <b>Saturated Fatty Acid</b>       |                             |                         |                    |                  |     |                         |
| Q1                                | 316                         | Ref.                    | 132                | Ref.             | 184 | Ref.                    |
| Q2                                | 299                         | 0.97 (0.83-1.14)        | 162                | 1.17 (0.93-1.47) | 137 | 0.83 (0.60-1.03)        |
| Q3                                | 296                         | 0.99 (0.84-1.16)        | 166                | 1.19 (0.94-1.50) | 130 | 0.84 (0.67-1.06)        |
| Q4                                | 289                         | 0.96 (0.81-1.13)        | 151                | 1.02 (0.81-1.30) | 138 | 0.92 (0.73-1.16)        |
| Q5                                | 296                         | 1.00 (0.84-1.20)        | 171                | 1.12 (0.87-1.45) | 125 | 0.90 (0.69-1.16)        |
| <i>P<sub>trend</sub></i>          |                             | 0.90                    |                    | 0.78             |     | 0.59                    |
| <b>Monounsaturated Fatty Acid</b> |                             |                         |                    |                  |     |                         |
| Q1                                | 307                         | Ref.                    | 139                | Ref.             | 168 | Ref.                    |
| Q2                                | 300                         | 0.98 (0.83-1.15)        | 143                | 0.94 (0.74-1.18) | 157 | 1.03 (0.83-1.28)        |
| Q3                                | 289                         | 0.97 (0.83-1.15)        | 155                | 1.03 (0.82-1.30) | 134 | 0.92 (0.73-1.17)        |
| Q4                                | 310                         | 1.06 (0.90-1.25)        | 173                | 1.11 (0.88-1.40) | 137 | 1.01 (0.79-1.28)        |
| Q5                                | 290                         | 1.02 (0.84-1.24)        | 172                | 1.06 (0.81-1.39) | 118 | 0.95 (0.71-1.26)        |
| <i>P<sub>trend</sub></i>          |                             | 0.57                    |                    | 0.30             |     | 0.69                    |
| <b>Polyunsaturated Fatty Acid</b> |                             |                         |                    |                  |     |                         |
| Q1                                | 321                         | Ref.                    | 151                | Ref.             | 172 | Ref.                    |
| Q2                                | 270                         | <b>0.83 (0.71-0.98)</b> | 138                | 0.86 (0.68-1.08) | 132 | 0.82 (0.65-1.03)        |
| Q3                                | 318                         | 0.97 (0.83-1.13)        | 162                | 0.98 (0.79-1.23) | 151 | 0.95 (0.76-1.18)        |
| Q4                                | 291                         | <b>0.87 (0.74-1.02)</b> | 162                | 0.94 (0.75-1.17) | 126 | <b>0.78 (0.62-0.99)</b> |
| Q5                                | 296                         | <b>0.86 (0.73-1.02)</b> | 169                | 0.89 (0.70-1.12) | 133 | <b>0.79 (0.62-1.01)</b> |
| <i>P<sub>trend</sub></i>          |                             | 0.15                    |                    | 0.56             |     | 0.06                    |
| <b>Linoleic Acid</b>              |                             |                         |                    |                  |     |                         |
| Q1                                | 312                         | Ref.                    | 152                | Ref.             | 160 | Ref.                    |
| Q2                                | 279                         | 0.89 (0.75-1.04)        | 132                | 0.81 (0.64-1.03) | 147 | 0.89 (0.71-1.13)        |
| Q3                                | 306                         | 0.96 (0.82-1.13)        | 167                | 1.00 (0.80-1.25) | 139 | 0.95 (0.76-1.20)        |
| Q4                                | 299                         | <b>0.91 (0.77-1.01)</b> | 162                | 0.91 (0.72-1.13) | 137 | 0.85 (0.67-1.07)        |
| Q5                                | 300                         | <b>0.86 (0.73-1.01)</b> | 169                | 0.86 (0.68-1.08) | 131 | 0.81 (0.64-1.03)        |
| <i>P<sub>trend</sub></i>          |                             | 0.13                    |                    | 0.44             |     | 0.28                    |
| <b>Linolenic Acid</b>             |                             |                         |                    |                  |     |                         |
| Q1                                | 318                         | Ref.                    | 154                | Ref.             | 164 | Ref.                    |
| Q2                                | 286                         | 0.92 (0.78-1.08)        | 152                | 0.95 (0.76-1.19) | 134 | 0.89 (0.70-1.11)        |
| Q3                                | 300                         | 0.97 (0.82-1.13)        | 149                | 0.91 (0.73-1.15) | 151 | 1.02 (0.82-1.28)        |
| Q4                                | 291                         | 0.95 (0.81-1.11)        | 153                | 0.95 (0.76-1.19) | 138 | 0.93 (0.74-1.18)        |
| Q5                                | 301                         | 0.98 (0.83-1.16)        | 174                | 1.07 (0.85-1.36) | 127 | 0.85 (0.66-1.09)        |
| <i>P<sub>trend</sub></i>          |                             | 0.94                    |                    | 0.63             |     | 0.35                    |
| <b>Arachidonic Acid</b>           |                             |                         |                    |                  |     |                         |
| Q1                                | 335                         | Ref.                    | 154                | Ref.             | 181 | Ref.                    |
| Q2                                | 316                         | 1.01 (0.87-1.18)        | 158                | 1.03 (0.83-1.29) | 158 | 1.00 (0.81-1.24)        |
| Q3                                | 311                         | 1.03 (0.88-1.20)        | 156                | 1.02 (0.81-1.27) | 155 | 1.06 (0.85-1.32)        |
| Q4                                | 260                         | 0.89 (0.76-1.05)        | 149                | 0.97 (0.77-1.22) | 111 | 0.81 (0.64-1.04)        |
| Q5                                | 274                         | 0.98 (0.83-1.16)        | 165                | 1.07 (0.85-1.35) | 109 | 0.87 (0.68-1.13)        |
| <i>P<sub>trend</sub></i>          |                             | 0.40                    |                    | 0.78             |     | 0.12                    |
| <b>Timnodonic Acid-EPA</b>        |                             |                         |                    |                  |     |                         |
| Q1                                | 303                         | Ref.                    | 151                | Ref.             | 152 | Ref.                    |
| Q2                                | 299                         | 1.00 (0.85-1.17)        | 168                | 1.07 (0.86-1.34) | 131 | 0.92 (0.73-1.16)        |
| Q3                                | 325                         | <b>1.18 (1.01-1.39)</b> | 162                | 1.13 (0.90-1.41) | 163 | <b>1.25 (1.00-1.57)</b> |
| Q4                                | 290                         | <b>1.17 (1.00-1.38)</b> | 144                | 1.11 (0.88-1.40) | 146 | 1.24 (0.99-1.57)        |

|                                |     |                         |     |                         |     |                         |
|--------------------------------|-----|-------------------------|-----|-------------------------|-----|-------------------------|
| Q5                             | 279 | <b>1.21 (1.03-1.43)</b> | 157 | <b>1.31 (1.04-1.65)</b> | 122 | 1.11 (0.87-1.41)        |
| <i>P<sub>trend</sub></i>       |     | <b>0.003</b>            |     | <b>0.03</b>             |     | 0.06                    |
| <b>DHA</b>                     |     |                         |     |                         |     |                         |
| Q1                             | 295 | Ref.                    | 152 | Ref.                    | 143 | Ref.                    |
| Q2                             | 298 | 1.00 (0.85-1.18)        | 161 | 1.00 (0.80-1.26)        | 137 | 1.01 (0.80-1.28)        |
| Q3                             | 322 | <b>1.19 (1.02-1.40)</b> | 163 | 1.12 (0.90-1.40)        | 159 | <b>1.29 (1.02-1.62)</b> |
| Q4                             | 295 | <b>1.21 (1.02-1.42)</b> | 148 | 1.13 (0.90-1.42)        | 147 | <b>1.30 (1.03-1.64)</b> |
| Q5                             | 286 | <b>1.26 (1.06-1.48)</b> | 158 | <b>1.29 (1.03-1.62)</b> | 128 | 1.21 (0.95-1.54)        |
| <i>P<sub>trend</sub></i>       |     | <b>0.0007</b>           |     | <b>0.02</b>             |     | <b>0.02</b>             |
| <b>Total n-3 PUFA</b>          |     |                         |     |                         |     |                         |
| Q1                             | 328 | Ref.                    | 164 | Ref.                    | 164 | Ref.                    |
| Q2                             | 282 | 0.89 (0.75-1.04)        | 137 | 0.80 (0.64-1.01)        | 145 | 0.97 (0.77-1.21)        |
| Q3                             | 285 | 0.91 (0.79-1.07)        | 148 | 0.88 (0.70-1.10)        | 137 | 0.94 (0.75-1.19)        |
| Q4                             | 303 | 0.99 (0.84-1.16)        | 164 | 0.99 (0.79-1.23)        | 139 | 0.97 (0.77-1.23)        |
| Q5                             | 298 | 1.00 (0.85-1.19)        | 169 | 0.99 (0.82-1.31)        | 129 | 0.92 (0.72-1.18)        |
| <i>P<sub>trend</sub></i>       |     | 0.61                    |     | 0.34                    |     | 0.57                    |
| <b>Total n-3 HUFA</b>          |     |                         |     |                         |     |                         |
| Q1                             | 313 | Ref.                    | 160 | Ref.                    | 153 | Ref.                    |
| Q2                             | 282 | 0.93 (0.79-1.09)        | 154 | 0.95 (0.76-1.18)        | 128 | 0.91 (0.72-1.16)        |
| Q3                             | 324 | <b>1.17 (1.00-1.37)</b> | 166 | 1.12 (0.90-1.39)        | 158 | 1.23 (0.98-1.54)        |
| Q4                             | 289 | 1.14 (0.97-1.34)        | 142 | 1.05 (0.83-1.32)        | 147 | 1.25 (1.00-1.58)        |
| Q5                             | 288 | <b>1.23 (1.05-1.45)</b> | 160 | <b>1.28 (1.02-1.60)</b> | 128 | 1.17 (0.92-1.49)        |
| <i>P<sub>trend</sub></i>       |     | <b>0.001</b>            |     | <b>0.02</b>             |     | 0.02                    |
| <b>Total n-6 PUFA</b>          |     |                         |     |                         |     |                         |
| Q1                             | 314 | Ref.                    | 151 | Ref.                    | 163 | Ref.                    |
| Q2                             | 275 | 0.87 (0.74-1.02)        | 132 | 0.82 (0.65-1.03)        | 143 | 0.92 (0.73-1.15)        |
| Q3                             | 305 | 0.95 (0.81-1.12)        | 167 | 1.01 (0.81-1.26)        | 138 | 0.89 (0.71-1.11)        |
| Q4                             | 305 | 0.92 (0.79-1.08)        | 163 | 0.92 (0.73-1.15)        | 142 | 0.91 (0.72-1.14)        |
| Q5                             | 297 | <b>0.84 (0.71-1.00)</b> | 169 | 0.87 (0.69-1.09)        | 128 | <b>0.78 (0.61-0.99)</b> |
| <i>P<sub>trend</sub></i>       |     | 0.14                    |     | 0.50                    |     | 0.07                    |
| <b>Ratio n-6 PUFA/n-3 PUFA</b> |     |                         |     |                         |     |                         |
| Q1                             | 314 | Ref.                    | 161 | Ref.                    | 153 | Ref.                    |
| Q2                             | 315 | 1.02 (0.87-1.20)        | 164 | 1.06 (0.85-1.32)        | 151 | 0.99 (0.79-1.24)        |
| Q3                             | 278 | 0.90 (0.77-1.06)        | 152 | 1.02 (0.81-1.28)        | 126 | <b>0.79 (0.62-1.01)</b> |
| Q4                             | 279 | 0.86 (0.73-1.01)        | 141 | 0.89 (0.71-1.13)        | 138 | 0.83 (0.65-1.05)        |
| Q5                             | 310 | <b>0.79 (0.67-0.93)</b> | 164 | 0.83 (0.66-1.04)        | 146 | <b>0.74 (0.59-0.94)</b> |
| <i>P<sub>trend</sub></i>       |     | <b>0.0005</b>           |     | <b>0.03</b>             |     | <b>0.004</b>            |

Abbreviations: BMI, body mass index; CI, confidence interval; HUFA, highly unsaturated fatty acid; HR, hazard ratio; PUFA, polyunsaturated fatty acid; SMHS, Shanghai Men's Health Study; SWHS, Shanghai Women's Health Study;

<sup>a</sup>Model adjusted for: age, ever smoking status, smoking packs-year (SMHS only), ever drinking status, BMI, physical activity status, total energy-adjusted red meat (g/day), total energy-adjusted vegetable intake (g/day), vitamin supplemental use, menopausal status, hormone replacement therapy (SWHS only).

**Supplemental Table 2. Association Between Fatty Acid Intake and Lung Cancer Risk in the SWHS and SMHS Overall (Different Models of Adjustment)**

|                                               | Pooled Analysis (SWHS+SMHS) |                         | Analysis by Cohort |                         |     |                         |
|-----------------------------------------------|-----------------------------|-------------------------|--------------------|-------------------------|-----|-------------------------|
|                                               | #                           | HR (95%CI)              | #                  | HR (95%CI)              | #   | HR (95%CI)              |
| <b>Total Fatty Acid<sup>a</sup></b>           |                             |                         |                    |                         |     |                         |
| Q1                                            | 314                         | Ref.                    | 134                | Ref.                    | 180 | Ref.                    |
| Q2                                            | 302                         | 0.93 (0.79-1.10)        | 154                | 1.06 (0.83-1.35)        | 148 | 0.85 (0.68-1.08)        |
| Q3                                            | 277                         | 0.85 (0.71-1.02)        | 150                | 1.01 (0.77-1.31)        | 127 | <b>0.75 (0.58-0.98)</b> |
| Q4                                            | 308                         | 0.92 (0.76-1.12)        | 168                | 1.07 (0.81-1.42)        | 140 | 0.83 (0.62-1.10)        |
| Q5                                            | 295                         | 0.82 (0.64-1.05)        | 176                | 1.02 (0.72-1.44)        | 119 | <b>0.69 (0.48-1.00)</b> |
| <i>P<sub>trend</sub></i>                      |                             | 0.18                    |                    | 0.87                    |     | 0.09                    |
| <b>Saturated Fatty Acid<sup>a</sup></b>       |                             |                         |                    |                         |     |                         |
| Q1                                            | 316                         | Ref.                    | 132                | Ref.                    | 184 | Ref.                    |
| Q2                                            | 299                         | 0.95 (0.81-1.12)        | 162                | 1.14 (0.90-1.45)        | 137 | 0.82 (0.65-1.03)        |
| Q3                                            | 296                         | 0.95 (0.80-1.13)        | 166                | 1.15 (0.90-1.48)        | 130 | 0.82 (0.64-1.05)        |
| Q4                                            | 289                         | 0.91 (0.76-1.09)        | 151                | 0.98 (0.75-1.28)        | 138 | 0.89 (0.69-1.16)        |
| Q5                                            | 296                         | 0.91 (0.74-1.12)        | 171                | 1.05 (0.77-1.42)        | 125 | 0.85 (0.63-1.15)        |
| <i>P<sub>trend</sub></i>                      |                             | 0.33                    |                    | 0.74                    |     | 0.50                    |
| <b>Monounsaturated Fatty Acid<sup>a</sup></b> |                             |                         |                    |                         |     |                         |
| Q1                                            | 307                         | Ref.                    | 139                | Ref.                    | 168 | Ref.                    |
| Q2                                            | 300                         | 0.96 (0.81-1.13)        | 143                | 0.92 (0.72-1.18)        | 157 | 1.02 (0.81-1.29)        |
| Q3                                            | 289                         | 0.94 (0.79-1.12)        | 155                | 1.01 (0.78-1.30)        | 134 | 0.91 (0.70-1.17)        |
| Q4                                            | 310                         | 1.00 (0.83-1.21)        | 173                | 1.07 (0.82-1.40)        | 137 | 0.98 (0.74-1.30)        |
| Q5                                            | 290                         | 0.92 (0.73-1.17)        | 172                | 1.00 (0.72-1.39)        | 118 | 0.90 (0.63-1.28)        |
| <i>P<sub>trend</sub></i>                      |                             | 0.76                    |                    | 0.58                    |     | 0.55                    |
| <b>Polyunsaturated Fatty Acid<sup>a</sup></b> |                             |                         |                    |                         |     |                         |
| Q1                                            | 323                         | Ref.                    | 151                | Ref.                    | 172 | Ref.                    |
| Q2                                            | 270                         | <b>0.76 (0.64-0.91)</b> | 138                | <b>0.78 (0.61-0.99)</b> | 132 | <b>0.76 (0.60-0.96)</b> |
| Q3                                            | 313                         | <b>0.83 (0.70-1.00)</b> | 162                | 0.85 (0.66-1.09)        | 151 | 0.84 (0.65-1.07)        |
| Q4                                            | 288                         | <b>0.70 (0.58-0.86)</b> | 162                | <b>0.76 (0.58-1.01)</b> | 126 | <b>0.66 (0.49-0.88)</b> |
| Q5                                            | 302                         | <b>0.61 (0.47-0.78)</b> | 169                | <b>0.63 (0.44-0.90)</b> | 133 | <b>0.59 (0.41-0.86)</b> |
| <i>P<sub>trend</sub></i>                      |                             | <b>0.0006</b>           |                    | <b>0.04</b>             |     | <b>0.007</b>            |
| <b>Linoleic Acid<sup>a</sup></b>              |                             |                         |                    |                         |     |                         |
| Q1                                            | 312                         | Ref.                    | 152                | Ref.                    | 160 | Ref.                    |
| Q2                                            | 279                         | <b>0.82 (0.69-0.97)</b> | 132                | <b>0.74 (0.58-0.95)</b> | 147 | 0.91 (0.72-1.15)        |
| Q3                                            | 306                         | <b>0.85 (0.71-1.01)</b> | 167                | 0.87 (0.68-1.12)        | 139 | 0.83 (0.64-1.07)        |
| Q4                                            | 299                         | <b>0.76 (0.63-0.92)</b> | 162                | <b>0.75 (0.57-0.98)</b> | 137 | <b>0.78 (0.60-1.03)</b> |
| Q5                                            | 300                         | <b>0.64 (0.50-0.82)</b> | 169                | <b>0.63 (0.45-0.88)</b> | 131 | <b>0.65 (0.46-0.92)</b> |
| <i>P<sub>trend</sub></i>                      |                             | <b>0.001</b>            |                    | <b>0.03</b>             |     | <b>0.02</b>             |
| <b>Linolenic Acid<sup>b</sup></b>             |                             |                         |                    |                         |     |                         |
| Q1                                            | 318                         | Ref.                    | 154                | Ref.                    | 164 | Ref.                    |
| Q2                                            | 286                         | 0.86 (0.73-1.03)        | 152                | 0.92 (0.72-1.18)        | 134 | 0.82 (0.64-1.05)        |
| Q3                                            | 300                         | 0.87 (0.72-1.05)        | 149                | 0.86 (0.66-1.14)        | 151 | 0.91 (0.69-1.19)        |
| Q4                                            | 291                         | 0.81 (0.65-1.01)        | 153                | 0.87 (0.64-1.20)        | 138 | 0.79 (0.57-1.08)        |
| Q5                                            | 301                         | 0.75 (0.55-1.01)        | 174                | 0.93 (0.61-1.43)        | 127 | <b>0.63 (0.40-0.99)</b> |
| <i>P<sub>trend</sub></i>                      |                             | 0.08                    |                    | 0.57                    |     | 0.13                    |
| <b>Arachidonic Acid<sup>a</sup></b>           |                             |                         |                    |                         |     |                         |
| Q1                                            | 335                         | Ref.                    | 154                | Ref.                    | 181 | Ref.                    |
| Q2                                            | 316                         | 1.00 (0.85-1.17)        | 158                | 1.02 (0.81-1.28)        | 158 | 1.00 (0.80-1.24)        |
| Q3                                            | 311                         | 1.01 (0.86-1.18)        | 156                | 1.00 (0.79-1.25)        | 155 | 1.05 (0.84-1.31)        |
| Q4                                            | 260                         | 0.86 (0.73-1.02)        | 149                | 0.94 (0.74-1.19)        | 111 | 0.80 (0.62-1.03)        |
| Q5                                            | 274                         | 0.93 (0.78-1.11)        | 165                | 1.02 (0.79-1.32)        | 109 | 0.86 (0.66-1.12)        |
| <i>P<sub>trend</sub></i>                      |                             | 0.16                    |                    | 0.89                    |     | 0.09                    |
| <b>Timnodonic Acid-EPA<sup>a</sup></b>        |                             |                         |                    |                         |     |                         |
| Q1                                            | 303                         | Ref.                    | 151                | Ref.                    | 152 | Ref.                    |
| Q2                                            | 299                         | 1.01 (0.86-1.19)        | 168                | 1.08 (0.87-1.35)        | 131 | 0.94 (0.74-1.19)        |
| Q3                                            | 325                         | <b>1.20 (1.02-1.41)</b> | 162                | 1.14 (0.91-1.43)        | 163 | <b>1.29 (1.03-1.62)</b> |
| Q4                                            | 290                         | <b>1.19 (1.01-1.41)</b> | 144                | 1.12 (0.88-1.42)        | 146 | <b>1.29 (1.02-1.64)</b> |

|                                            |     |                         |     |                         |     |                         |
|--------------------------------------------|-----|-------------------------|-----|-------------------------|-----|-------------------------|
| Q5                                         | 279 | <b>1.23 (1.03-1.68)</b> | 157 | <b>1.32 (1.02-1.69)</b> | 122 | 1.16 (0.89-1.51)        |
| <i>P<sub>trend</sub></i>                   |     | <b>0.005</b>            |     | <b>0.05</b>             |     | <b>0.03</b>             |
| <b>DHA<sup>a</sup></b>                     | 295 | Ref.                    | 152 | Ref.                    | 143 | Ref.                    |
| Q1                                         | 298 | 1.02 (0.87-1.20)        | 161 | 1.01 (0.81-1.26)        | 137 | 1.03 (0.81-1.31)        |
| Q2                                         | 322 | <b>1.21 (1.03-1.42)</b> | 163 | 1.13 (0.90-1.41)        | 159 | <b>1.32 (1.05-1.67)</b> |
| Q3                                         | 295 | <b>1.23 (1.04-1.45)</b> | 148 | 1.14 (0.90-1.43)        | 147 | <b>1.35 (1.06-1.71)</b> |
| Q4                                         | 286 | <b>1.28 (1.07-1.53)</b> | 158 | <b>1.30 (1.02-1.67)</b> | 128 | 1.28 (0.99-1.66)        |
| Q5                                         |     | <b>0.0007</b>           |     | 0.02                    |     | <b>0.007</b>            |
| <i>P<sub>trend</sub></i>                   |     |                         |     |                         |     |                         |
| <b>Total n-3 PUFA<sup>b</sup></b>          |     |                         |     |                         |     |                         |
| Q1                                         | 294 | Ref.                    | 164 | Ref.                    | 168 | Ref.                    |
| Q2                                         | 299 | 0.90 (0.76-1.07)        | 137 | 0.83 (0.65-1.05)        | 145 | 1.00 (0.79-1.27)        |
| Q3                                         | 323 | 0.94 (0.78-1.12)        | 148 | 0.92 (0.71-1.18)        | 137 | 0.99 (0.77-1.29)        |
| Q4                                         | 294 | 1.02 (0.84-1.25)        | 164 | 1.05 (0.80-1.39)        | 139 | 1.04 (0.78-1.39)        |
| Q5                                         | 286 | 1.21 (0.82-1.35)        | 169 | 1.14 (0.81-1.61)        | 129 | 1.03 (0.72-1.48)        |
| <i>P<sub>trend</sub></i>                   |     | 0.42                    |     | 0.21                    |     | 0.80                    |
| <b>Total n-3 HUFA<sup>b</sup></b>          |     |                         |     |                         |     |                         |
| Q1                                         | 313 | Ref.                    | 160 | Ref.                    | 153 | Ref.                    |
| Q2                                         | 282 | 0.94 (0.80-1.11)        | 154 | 0.95 (0.76-1.19)        | 128 | 0.93 (0.73-1.18)        |
| Q3                                         | 324 | <b>1.18 (1.01-1.39)</b> | 166 | 1.13 (0.91-1.41)        | 158 | <b>1.26 (1.00-1.58)</b> |
| Q4                                         | 289 | 1.16 (0.98-1.36)        | 142 | 1.06 (0.84-1.33)        | 147 | <b>1.29 (1.02-1.62)</b> |
| Q5                                         | 288 | <b>1.24 (1.05-1.47)</b> | 160 | <b>1.29 (1.02-1.62)</b> | 128 | 1.19 (0.94-1.52)        |
| <i>P<sub>trend</sub></i>                   |     | <b>0.0008</b>           |     | <b>0.02</b>             |     | <b>0.01</b>             |
| <b>Total n-6 PUFA<sup>a</sup></b>          |     |                         |     |                         |     |                         |
| Q1                                         | 314 | Ref.                    | 151 | Ref.                    | 163 | Ref.                    |
| Q2                                         | 275 | <b>0.80 (0.68-0.95)</b> | 132 | <b>0.75 (0.59-0.96)</b> | 143 | 0.86 (0.68-1.09)        |
| Q3                                         | 305 | <b>0.84 (0.71-1.00)</b> | 167 | 0.88 (0.69-1.13)        | 138 | 0.80 (0.62-1.03)        |
| Q4                                         | 305 | <b>0.77 (0.64-0.93)</b> | 163 | <b>0.76 (0.58-1.00)</b> | 142 | <b>0.79 (0.60-1.04)</b> |
| Q5                                         | 297 | <b>0.63 (0.49-0.80)</b> | 169 | <b>0.64 (0.46-0.90)</b> | 128 | <b>0.61 (0.43-0.87)</b> |
| <i>P<sub>trend</sub></i>                   |     | <b>0.001</b>            |     | <b>0.01</b>             |     | <b>0.01</b>             |
| <b>Ratio n-6 PUFA/n-3 PUFA<sup>c</sup></b> |     |                         |     |                         |     |                         |
| Q1                                         | 314 | Ref.                    | 161 | Ref.                    | 153 | Ref.                    |
| Q2                                         | 315 | 1.03 (0.88-1.20)        | 164 | 1.07 (0.86-1.34)        | 151 | 0.99 (0.79-1.24)        |
| Q3                                         | 278 | 0.91 (0.77-1.07)        | 152 | 1.00 (0.83-1.30)        | 126 | <b>0.80 (0.63-1.02)</b> |
| Q4                                         | 279 | 0.87 (0.74-1.03)        | 141 | 0.92 (0.73-1.16)        | 138 | 0.84 (0.66-1.07)        |
| Q5                                         | 310 | <b>0.81 (0.69-0.96)</b> | 164 | 0.87 (0.69-1.09)        | 146 | <b>0.76 (0.60-0.98)</b> |
| <i>P<sub>trend</sub></i>                   |     | <b>0.003</b>            |     | 0.10                    |     | <b>0.01</b>             |

Abbreviations: BMI, body mass index; CI, confidence interval; HUFA, highly unsaturated fatty acid; HR, hazard ratio; PUFA, polyunsaturated fatty acid; SMHS, Shanghai Men's Health Study; SWHS, Shanghai Women's Health Study;

<sup>a</sup>Model adjusted for: age, ever smoking status, smoking packs-year (SMHS only), ever drinking status, BMI, physical activity status, total energy-adjusted n-3 PUFA intake (g/day), total energy-adjusted red meat (g/day), total energy-adjusted vegetable intake (g/day), vitamin supplemental use, menopausal status, hormone replacement therapy (SWHS only).

<sup>b</sup>Model adjusted for: age, ever smoking status, smoking packs-year (SMHS only), ever drinking status, BMI, physical activity status, total energy-adjusted n-6 PUFA intake (g/day), total energy-adjusted red meat (g/day), total energy-adjusted vegetable intake (g/day), vitamin supplemental use, menopausal status, hormone replacement therapy (SWHS only).

<sup>c</sup>Model adjusted for: age, ever smoking status, smoking packs-year (SMHS only), ever drinking status, BMI, physical activity status, total energy-adjusted n-3 PUFA intake (g/day), total energy-adjusted n-6 PUFA intake (g/day), total energy-adjusted red meat (g/day), total energy-adjusted vegetable intake (g/day), vitamin supplemental use, menopausal status, hormone replacement therapy (SWHS only).
